# Supplementary material
Source: PubMed Central journal article supplement (PMC2527912)
Supplement: 0805589105_0805589105SI.pdf [file 0805589105_0805589105SI.pdf]

# Supporting Information

Brown et al. 10.1073/pnas.0805589105

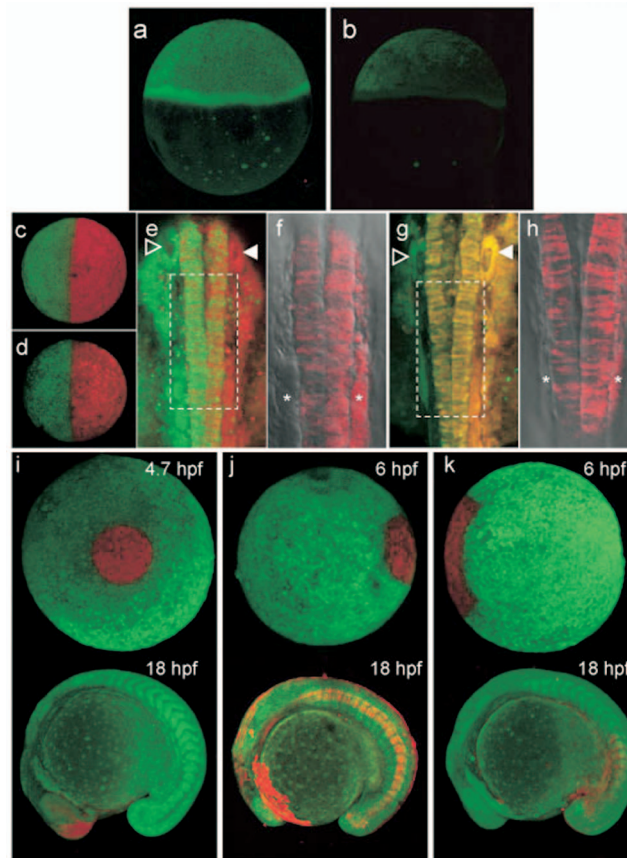

**Fig. S1.** Comparison of cell-lineage labeling by Kaede protein and *kaede* mRNA. (A) Late blastula-stage (40% epiboly) embryo that was injected with 3.5 ng of purified Kaede protein, lateral view. (B) Late-blastula-stage embryo that was injected with 300 pg of *kaede* mRNA, lateral view. (C and D) Kaede-protein-injected (C) and *kaede*-mRNA-injected (D) embryos immediately after photolabeling of right halves at shield stage (6 hpf), animal pole views, dorsal to the top. (E and G) Same Kaede-protein-injected (E) and *kaede*-mRNA-injected (G) embryos as in C and D, but now at the pharyngula stage (24 hpf). Dorsal views of trunk and posterior head are shown and the left (open arrowhead) and right (white arrowhead) ears are indicated. (F and H) Alternate and magnified views of the spinal cord regions marked by the dashed rectangles in E and G, highlighting the mixture of left and right cell lineages in the spinal cord, but not in the flanking paraxial mesoderm (asterisks), as previously documented (1). (I–K) Sample lineage tracing experiments with Kaede protein; two time points are shown for each embryo. (I) Labeled animal pole cells at the late blastula stage (4.7 hpf) contribute to the eye and forebrain in the anterior head region at 18 hpf. (J) Labeled dorsal gastrula organizer cells from the shield stage (6 hpf) contribute to the notochord and the floor plate in the trunk, the hatching gland in the anterior, and the fin mesenchyme and periderm along the surface. (K) Labeled ventral cells from the shield stage (6 hpf) contribute to somites, tail mesenchyme, and blood progenitors in the posterior. A–E, G, and I–K are overlays of red and green channels from multiple optical sections; F and H are overlays of red and DIC channels from single optical sections.

1. Kimmel CB, Warga RM, Kane DA (1994) Cell cycles and clonal strings during formation of the zebrafish central nervous system. *Development* 120:265–276.



**Table S1. Summary of transplantation assays and fate outcomes**

|                                     | Epidermis | Eye | Forebrain | Midbrain | Neural crest | Blood | Endoderm | Muscle | EVL | Unclassified |
|-------------------------------------|-----------|-----|-----------|----------|--------------|-------|----------|--------|-----|--------------|
| Post FAM-P (Mes + Ect) transplants  |           |     |           |          |              |       |          |        |     |              |
| Mes (red cell fates) N=8            | —         | 3   | 4         | —        | —            | 6     | 6        | 1      | 1   | 1            |
| Ect (green cell fates) N=8          | —         | 4   | 7         | —        | —            | —     | —        | —      | 2   | 1            |
| Traditional single-cell transplants |           |     |           |          |              |       |          |        |     |              |
| Mes N=53                            | 7         | 23  | 21        | —        | 1            | 13    | 12       | —      | 9   | 10           |
| Ect N=38                            | 4         | 18  | 22        | —        | —            | —     | —        | —      | 3   | 4            |

Two types of transplants were performed: (i) mixed (mesendoderm + ectoderm precursors) transplants of FAM-P-purified cells and (ii) single-cell transplants of mesendoderm (Mes) or ectoderm (Ect) precursors conventionally isolated by micropipette explantation. The number of observations of tissue-specific clones arising from mixed transplants of FAM-P-sorted cells and scored the next day are shown in the first two rows, with the outcomes of red and green cells scored separately. For these transplants, isolated red mesendoderm and green ectoderm precursors were pooled, and 8–30 cells were injected to the animal poles of host embryos. The day 2 outcomes from single-cell embryo-to-embryo transplants are shown in the bottom two rows. The mesendoderm precursor cells in these latter transplants were directly extracted from donor margins while the ectoderm precursor cells were directly removed from donor animal poles, and both were transplanted to host animal poles. Observed clones were assigned to one of 10 categories, with ectodermal outcomes shown in the first five columns, mesoderm and endoderm outcomes in the next three columns, extraembryonic outcomes in the next column, and outcomes we were unable to classify in the final column.

**Table S2. Identities and characteristics of the top 60 genes enriched among mesendoderm precursors, ectoderm precursors, and control cells (photoconverted vs. nonphotoconverted cells)**

| Gene symbol                   | Cat. | Path          | P value | Avg enrich. |
|-------------------------------|------|---------------|---------|-------------|
| <b>Mesendoderm precursors</b> |      |               |         |             |
| acsf2                         | E    |               | 0.04    | 5.4         |
| aldh1a2                       | E    | RA (1)        | 0.047   | 7.1         |
| bon                           | TF   | N (2)         | 0.032   | 7.1         |
| copeb                         | TF   |               | 0.048   | 4           |
| dkk1                          | LAR  | N (2), W (5)  | 0.048   | 6.4         |
| efnb2b                        | LAR  | N (2)         | 0.04    | 17.5        |
| fgf24                         | LAR  | F (6)         | 0.029   | 5           |
| fgf3                          | LAR  | N (2), F (7)  | 0.03    | 10.2        |
| fgf8                          | LAR  | N (2), F (8)  | 0.011   | 6.1         |
| foxa2                         | TF   | N (2)         | 0.031   | 6.7         |
| foxa3                         | TF   | N (2), W (10) | 0.036   | 7.3         |
| foxc1a                        | TF   |               | 0.03    | 6           |
| frzb                          | LAR  | W (12)        | 0.048   | 5.7         |
| gata5                         | TF   | N (2)         | 0.03    | 10          |
| gata6                         | TF   |               | 0.039   | 8.6         |
| irx3a                         | TF   | N (2)         | 0.03    | 8.7         |
| ism1                          |      |               | 0.036   | 7.3         |
| lft1                          | LAR  | N (2)         | 0.032   | 7.1         |
| lhx1a                         | TF   | N (2)         | 0.04    | 17.5        |
| lhx1b                         | TF   |               | 0.031   | 4           |
| lmo1                          | TF   |               | 0.035   | 21.6        |
| mespa                         | TF   | RA (15)       | 0.035   | 7.4         |
| mespb                         | TF   | RA (15)       | 0.03    | 5.9         |
| msgn1                         | TF   |               | 0.036   | 7.2         |
| mta3                          | TF   |               | 0.033   | 7.5         |
| myf5                          | TF   |               | 0.04    | 8.1         |
| ndr1                          | LAR  |               | 0.036   | 5.3         |
| ndr2                          | LAR  |               | 0.032   | 5.3         |
| nr2f1                         | TF   |               | 0.032   | 7.8         |
| og9x                          | TF   | N (2)         | 0.044   | 6.4         |
| osr1                          |      |               | 0.048   | 8.5         |
| pcdh8                         |      |               | 0.048   | 11.8        |
| pitx2a                        | TF   | N (2)         | 0.03    | 8.3         |
| pxk                           | E    |               | 0.049   | 5.2         |
| rag2                          |      |               | 0.029   | 4.2         |
| scube2                        | LAR  |               | 0.04    | 7.3         |
| shhb                          | LAR  |               | 0.035   | 5.2         |
| si:busm1-6a2.1                | LAR  |               | 0.031   | 4.2         |
| si:ch211-241e15.2             |      |               | 0.035   | 5.5         |
| six3b                         | TF   | N (2), W (20) | 0.048   | 4.7         |
| six4.1                        | TF   |               | 0.048   | 8.5         |
| sox21b                        | TF   |               | 0.039   | 10.7        |
| sox32                         | TF   | N (2)         | 0.032   | 19.3        |
| sp5                           | TF   | W (22)        | 0.03    | 8.8         |
| tagln2                        |      |               | 0.043   | 4.3         |
| tbr1                          | TF   |               | 0.04    | 11.5        |
| tph1b                         | E    | N (2)         | 0.03    | 6.7         |
| trim24                        | TF   |               | 0.036   | 5.5         |
| wnt5b                         | LAR  | W (23)        | 0.029   | 4.4         |
| wu:fb71h11                    |      |               | 0.031   | 5.4         |
| zgc:110248                    |      |               | 0.04    | 21.8        |
| zgc:110712                    |      |               | 0.044   | 5.4         |
| zgc:136605                    |      |               | 0.049   | 5.7         |
| zgc:153377                    |      |               | 0.03    | 6           |
| zgc:158459                    |      |               | 0.035   | 4.6         |
| zgc:56201                     |      |               | 0.03    | 8.1         |
| zgc:85811                     | E    |               | 0.03    | 6           |
| zgc:86722                     | E    |               | 0.029   | 4.5         |
| zgc:91960                     |      |               | 0.046   | 4.2         |
| zic2a                         | TF   |               | 0.03    | 7.7         |
| <b>Ectoderm precursors</b>    |      |               |         |             |

| Gene symbol       | Cat. | Path                        | P value | Avg enrich. |
|-------------------|------|-----------------------------|---------|-------------|
| aldob             | E    |                             | 0.053   | 2.44        |
| atic              | E    |                             | 0.055   | 2.26        |
| ccna1             |      |                             | 0.053   | 2.4         |
| cd9               |      |                             | 0.053   | 4.04        |
| clasp2            |      |                             | 0.053   | 2.45        |
| cobra1            | TF   |                             | 0.053   | 2.28        |
| cs                | E    |                             | 0.053   | 2.61        |
| dbx1b             | TF   |                             | 0.053   | 2.61        |
| dio2              | E    |                             | 0.053   | 2.74        |
| dullard           | E    |                             | 0.055   | 2.35        |
| eif4a1b           | E    |                             | 0.055   | 2.37        |
| f2r1              |      |                             | 0.053   | 2.29        |
| fbxl18            |      |                             | 0.053   | 2.63        |
| foxb1             | TF   | N (31)                      | 0.041   | 2.82        |
| foxi1             | TF   | F (13)                      | 0.055   | 2.31        |
| gc3               | E    |                             | 0.054   | 2.69        |
| gtpbp1l           | E    |                             | 0.052   | 2.91        |
| her4.2            | TF   |                             | 0.055   | 3.23        |
| hoxd10a           | TF   |                             | 0.054   | 2.54        |
| hoxd13a           | TF   |                             | 0.044   | 2.87        |
| id1               | TF   |                             | 0.055   | 2.92        |
| ilk               | E    |                             | 0.053   | 2.45        |
| itm1              | E    |                             | 0.052   | 2.49        |
| ivns1abpb         |      |                             | 0.053   | 2.34        |
| lhx5              | TF   | W (16)                      | 0.053   | 6.95        |
| mastl             | E    |                             | 0.055   | 2.32        |
| mcm2              | E    |                             | 0.054   | 2.44        |
| mcm4              | E    |                             | 0.052   | 2.51        |
| msxe              | TF   |                             | 0.053   | 2.86        |
| mtnr1a            | LAR  |                             | 0.053   | 2.78        |
| ndrg1             |      |                             | 0.055   | 2.63        |
| ndrg3b            |      |                             | 0.054   | 2.3         |
| otx2              | TF   | W (17, 18), F (17), RA (17) | 0.052   | 2.86        |
| piwil2            |      |                             | 0.053   | 2.46        |
| pkm2              | E    |                             | 0.048   | 3.76        |
| pole2             | E    |                             | 0.054   | 2.51        |
| ppp2r1b           | E    |                             | 0.054   | 2.38        |
| prdm5             | TF   |                             | 0.052   | 2.87        |
| racgap1           |      |                             | 0.052   | 2.29        |
| rasl11b           | E    |                             | 0.053   | 2.5         |
| si:ch211-105d11.2 |      |                             | 0.053   | 2.62        |
| si:ch211-238n5.5  | E    |                             | 0.053   | 2.65        |
| slc25a12          |      |                             | 0.053   | 2.44        |
| snai2             |      |                             | 0.049   | 5.06        |
| sox19a            | TF   |                             | 0.053   | 4.75        |
| sox19b            | TF   |                             | 0.053   | 2.88        |
| sox3              | TF   |                             | 0.049   | 7.23        |
| tfdp1l            | TF   |                             | 0.055   | 2.52        |
| th1l              | TF   |                             | 0.053   | 2.27        |
| tnpo3             |      |                             | 0.055   | 2.27        |
| tsc22d3           | TF   |                             | 0.052   | 2.34        |
| txnip             |      |                             | 0.053   | 2.36        |
| wnt4a             | LAR  | W (25)                      | 0.052   | 2.74        |
| wu:fj19d05        |      |                             | 0.053   | 2.73        |
| yy1l              | TF   |                             | 0.036   | 2.92        |
| zgc:163117        | E    |                             | 0.055   | 2.31        |
| zgc:171444        |      |                             | 0.053   | 2.27        |
| zgc:85653         |      |                             | 0.055   | 2.26        |
| zgc:86896         |      |                             | 0.053   | 2.84        |
| zgc:92139         | E    |                             | 0.055   | 2.36        |
| <b>Control</b>    |      |                             |         |             |
| amotl2            |      |                             | 0.15    | 1.31        |
| arrdc2            |      |                             | 0.16    | 1.25        |
| axin1             |      | W (3)                       | 0.15    | 1.29        |



| Gene symbol                              | Cat. | Path           | P value | Avg enrich. |
|------------------------------------------|------|----------------|---------|-------------|
| cldng                                    |      |                |         |             |
| copa                                     |      |                |         |             |
| cpn1                                     |      |                |         |             |
| csnk1d                                   |      |                |         |             |
| cstlb                                    |      | N (2)          |         |             |
| dact2                                    |      | N (2), W (11)  |         |             |
| dmd                                      |      |                |         |             |
| ek3                                      |      |                |         |             |
| flh                                      |      | N (2)          |         |             |
| foxa                                     |      |                |         |             |
| foxa2                                    |      | N (2)          |         |             |
| foxa3                                    |      | N (2), W (10)  |         |             |
| foxc1a                                   |      |                |         |             |
| fzd8a                                    |      | N (2)          |         |             |
| fzd8b                                    |      | N (2), W (14)  |         |             |
| gata5                                    |      | N (2)          |         |             |
| gpm6ab                                   |      |                |         |             |
| gsc                                      |      | N (2), W (10)  |         |             |
| hdlbp                                    |      |                |         |             |
| hspa5                                    |      |                |         |             |
| hyou1                                    |      |                |         |             |
| id3                                      |      | N (2)          |         |             |
| insig1                                   |      |                |         |             |
| mbtpps1                                  |      |                |         |             |
| mknk2                                    |      |                |         |             |
| msf                                      |      |                |         |             |
| msgn1                                    |      |                |         |             |
| mylip                                    |      | W (19)         |         |             |
| nog1                                     |      |                |         |             |
| nrp2b                                    |      |                |         |             |
| ntd5                                     |      |                |         |             |
| otx1                                     |      | N (2)          |         |             |
| p4ha2                                    |      |                |         |             |
| pcdh10b                                  |      |                |         |             |
| pitx2a                                   |      | N (2)          |         |             |
| plod                                     |      |                |         |             |
| ptpn12                                   |      |                |         |             |
| rpn1                                     |      |                |         |             |
| rrbp1                                    |      |                |         |             |
| sb:cb246 (epha4a)                        |      |                |         |             |
| sb:cb560*                                |      |                |         |             |
| sb:cb620 (si:ch211-284e13.2)             |      |                |         |             |
| sec22l1b                                 |      |                |         |             |
| sec23b                                   |      |                |         |             |
| sec61b                                   |      |                |         |             |
| shh                                      |      | N (26)         |         |             |
| Si:dkey-239d21.1*                        |      |                |         |             |
| six3b                                    |      | N (2)          |         |             |
| smox                                     |      |                |         |             |
| sox32                                    |      | N (2)          |         |             |
| ssr2                                     |      |                |         |             |
| tbx1                                     |      | N (2), RA (27) |         |             |
| tbx16                                    |      | N (2), F (28)  |         |             |
| tcf7l1a                                  |      | W (29)         |         |             |
| tnfsf10l                                 |      |                |         |             |
| tph1l                                    |      | N (2)          |         |             |
| tra1                                     |      |                |         |             |
| tram                                     |      |                |         |             |
| Transcribed locus*                       |      |                |         |             |
| Transcribed locus, moderately similar to |      |                |         |             |
| XP_216035.2*                             |      |                |         |             |
| ugdh                                     |      |                |         |             |

| Gene symbol                               | Cat. | Path          | P value | Avg enrich. |
|-------------------------------------------|------|---------------|---------|-------------|
| wu:fa99h02 (zgc:92222)                    |      |               |         |             |
| wu:fb74c11*                               |      |               |         |             |
| wu:fb74c11*                               |      |               |         |             |
| wu:fb99h12*                               |      |               |         |             |
| wu:fc37b12*                               |      |               |         |             |
| wu:fd44f11*                               |      |               |         |             |
| wu:fj66a01*                               |      |               |         |             |
| wu:fj79f01 (zgc:136639)                   |      |               |         |             |
| xbp1                                      |      | N (2)         |         |             |
| za20d2                                    |      |               |         |             |
| zgc:55257 (cited3)                        |      |               |         |             |
| zgc:56419*                                |      |               |         |             |
| zgc:64098*                                |      |               |         |             |
| zgc:73265*                                |      |               |         |             |
| zgc:76908 (gapdhs)                        |      |               |         |             |
| zgc:77254 (rbm35b)                        |      |               |         |             |
| zgc:77327 (aga)                           |      |               |         |             |
| zgc:77731 (dnajc3)                        |      |               |         |             |
| zgc:77773 (pdia4)                         |      |               |         |             |
| zgc:85752*                                |      |               |         |             |
| zgc:86863 (cdkrap3)                       |      |               |         |             |
| zgc:86940 (ssr4)                          |      |               |         |             |
| zgc:92579 (arfp2a)                        |      |               |         |             |
| zgc:92668*                                |      |               |         |             |
| <b>Dickmeis et al. 2001</b>               |      |               |         |             |
| 26s protease regulatory subunit 7*        |      |               |         |             |
| 26s proteasome regulatory chain 12*       |      |               |         |             |
| admp                                      |      | N (2)         |         |             |
| beta-1 integrin*                          |      |               |         |             |
| bhik                                      |      | N (2)         |         |             |
| cathepsin 1 related*                      |      |               |         |             |
| cathepsin 1*                              |      |               |         |             |
| cbs                                       |      |               |         |             |
| cdh10                                     |      |               |         |             |
| cdh18                                     |      |               |         |             |
| chd                                       |      | N (2)         |         |             |
| chn1                                      |      |               |         |             |
| ckb                                       |      |               |         |             |
| d-3 phosphoglycerate dehydrogenase*       |      |               |         |             |
| ddx54                                     |      |               |         |             |
| dhm1-like protein*                        |      |               |         |             |
| dipeptidyl-peptidase i*                   |      |               |         |             |
| eef1g                                     |      |               |         |             |
| eif-3 eta                                 |      |               |         |             |
| ell2                                      |      |               |         |             |
| enc1                                      |      |               |         |             |
| ephx1                                     |      |               |         |             |
| foxa2                                     |      | N (2)         |         |             |
| foxa3                                     |      | N (2), W (10) |         |             |
| frizzled E3*                              |      |               |         |             |
| frzb                                      |      | W (10)        |         |             |
| fscn1                                     |      |               |         |             |
| fzd8b                                     |      | N (2), W (14) |         |             |
| gata5                                     |      | N (2)         |         |             |
| gata6                                     |      |               |         |             |
| glutamine synthetase*                     |      |               |         |             |
| hdac1                                     |      | W (21)        |         |             |
| Heterogenous nuclear ribonucleoprotein h* |      |               |         |             |
| hnrnpu                                    |      |               |         |             |
| id3                                       |      | N (2)         |         |             |
| intermediate filament protein on3*        |      |               |         |             |
| itga5                                     |      |               |         |             |
| keratin*                                  |      |               |         |             |
| khdrbs1                                   |      |               |         |             |



| Gene symbol                                                 | Cat. | Path          | P value | Avg enrich. |
|-------------------------------------------------------------|------|---------------|---------|-------------|
| klf4                                                        |      |               |         |             |
| kpnb3                                                       |      |               |         |             |
| kruppel-type zinc finger*                                   |      |               |         |             |
| lft2                                                        |      | N (2)         |         |             |
| malate dehydrogenase*                                       |      |               |         |             |
| marcks                                                      |      |               |         |             |
| Max-like bHLH-Zip protein*                                  |      |               |         |             |
| oep                                                         |      | N (24)        |         |             |
| otx1l                                                       |      | N (2)         |         |             |
| pdip5                                                       |      | N (2)         |         |             |
| plasma membrane calcium-transporting ATPase, brain isoform* |      |               |         |             |
| pou5f1                                                      |      |               |         |             |
| protein-tyrosine phosphatase (bm-008)*                      |      |               |         |             |
| prp8 protein*                                               |      |               |         |             |
| ptb-associated splicing factor*                             |      |               |         |             |
| ranbp3-a*                                                   |      |               |         |             |
| retinal short-chain dehydrogenase/reductase*                |      |               |         |             |
| sec61a                                                      |      |               |         |             |
| sf3a3                                                       |      |               |         |             |
| slc25a3                                                     |      |               |         |             |
| sox32                                                       |      | N (2)         |         |             |
| sp5                                                         |      | W (30)        |         |             |
| srp72                                                       |      |               |         |             |
| ssecks*                                                     |      |               |         |             |
| ssr2                                                        |      |               |         |             |
| tbx16                                                       |      | N (2), F (28) |         |             |
| tfa                                                         |      |               |         |             |
| TFIIIF-alpha*                                               |      |               |         |             |
| tnpo2                                                       |      |               |         |             |
| tra2a                                                       |      |               |         |             |
| translation initiation factor 4 gamma 2*                    |      |               |         |             |
| tristetraproline*                                           |      |               |         |             |
| type II basic cytokeratin*                                  |      |               |         |             |
| type-I cytokeratin (50% identity)*                          |      |               |         |             |
| ul snrnp 70kDa*                                             |      |               |         |             |
| zgc:153632                                                  |      |               |         |             |
| zp2                                                         |      |               |         |             |

For each of these cohorts, the following information is given: gene symbol, functional category (cat.), pathway (path.), average enrichment (avg enrich), and the Benjamini-Hochberg corrected *P* value (representing the statistically predicted false positive rate). The cohorts were determined as follows: the standard 5% cutoff (Benjamini-Hochberg corrected  $P < 0.05$ ) was applied to the mesendoderm-enriched cohort, but less stringent filters (5.5% and 16%, respectively) were applied to ectoderm-enriched and red control cell-enriched cohorts, so as to obtain sufficient numbers of relevant genes for parallel analyses. Duplicates and insufficiently annotated genes (i.e., "LOC" IDs and no RefSeq name) were also removed. Only selected molecular categories and pathways are shown. Molecular categories: E, enzyme; LAR, ligand (agonist), antagonistic ligand, or receptor; TF, transcription factor. Pathways: N, Nodal pathway; W, Wnt pathway; F, FGF pathway; RA, retinoic acid pathway. Pathway assignment was based on the referenced published data showing strong genetic or molecular links of a particular gene to a particular pathway. The same curation process for pathway assignment was also applied to data sets from Link *et al.* (33) and Dickmeis *et al.* (34), which we have relisted, with updated nomenclature where available.

\*Definitive gene identity could not be determined.

1. Begemann G, Schilling TF, Rauch GJ, Geisler R, Ingham PW (2001) The zebrafish neckless mutation reveals a requirement for raldh2 in mesodermal signals that pattern the hindbrain. *Development* 128:3081–3094.
2. Bennett JT, et al. (2007) Nodal signaling activates differentiation genes during zebrafish gastrulation. *Dev Biol* 304:525–540.
3. Heisenberg CP, et al. (2001) A mutation in the Gsk3-binding domain of zebrafish Masterblind/Axin1 leads to a fate transformation of telencephalon and eyes to diencephalon. *Genes Dev* 15:1427–1434.
4. Rubinstein AL, Lee D, Luo R, Henion PD, Halpern ME (2000) Genes dependent on zebrafish cyclops function identified by AFLP differential gene expression screen. *Genesis* 26:86–97.
5. Shinya M, Eschbach C, Clark M, Lehrach H, Furutani-Seiki M. (2000) Zebrafish Dkk1, induced by the pre-MBT Wnt signaling, is secreted from the prechordal plate and patterns the anterior neural plate. *Mech Dev* 98:3–17.
6. Fischer S, Draper BW, Neumann CJ (2003) The zebrafish fgf24 mutant identifies an additional level of Fgf signaling involved in vertebrate forelimb initiation. *Development* 130:3515–3524.
7. Kiefer P, Mathieu M, Mason I, Dickson C (1996) Secretion and mitogenic activity of zebrafish FGF3 reveal intermediate properties relative to mouse and Xenopus homologues. *Oncogene* 12:1503–1511.
8. Reifers F, et al. (1998) Fgf8 is mutated in zebrafish acerebellar (ace) mutants and is required for maintenance of midbrain-hindbrain boundary development and somitogenesis. *Development* 125:2381–2395.
9. Varga M, Maegawa S, Bellipanni G, Weinberg ES (2007) Chordin expression, mediated by Nodal and FGF signaling, is restricted by redundant function of two beta-catenins in the zebrafish embryo. *Mech Dev* 124:775–791.
10. Seilliez I, Thisse B, Thisse C (2006) FoxA3 and gooseoid promote anterior neural fate through inhibition of Wnt8a activity before the onset of gastrulation. *Dev Biol* 290:152–163.
11. Waxman JS, Hocking AM, Stoick CL, Moon RT (2004) Zebrafish Dapper1 and Dapper2 play distinct roles in Wnt-mediated developmental processes. *Development* 131:5909–5921.
12. Tendeng C, Houart C (2006) Cloning and embryonic expression of five distinct sfrp genes in the zebrafish *Danio rerio*. *Gene Expr Patterns* 6:761–771.
13. Nissen RM, Yan J, Amsterdam A, Hopkins N, Burgess SM (2003) Zebrafish foxi one modulates cellular responses to Fgf signaling required for the integrity of ear and jaw patterning. *Development* 130:2543–2554.
14. Kim SH, et al. Characterization of two frizzled8 homologues expressed in the embryonic shield and prechordal plate of zebrafish embryos. *Mech Dev* 78:193–201.
15. Moreno TA, Jappelli R, Belmonte JC, Kintner C (2008) Retinoic acid regulation of the Mesp-Ripply feedback loop during vertebrate segmental patterning. *Dev Biol* 315:317–330.
16. Peng G, Westerfield M (2006) Lhx5 promotes forebrain development and activates transcription of secreted Wnt antagonists. *Development* 133:3191–3200.
17. Kudoh T, Wilson SW, Dawid IB (2002) Distinct roles for Fgf, Wnt and retinoic acid in posteriorizing the neural ectoderm. *Development* 129:4335–4346.
18. Yamamoto S, Hikasa H, Ono H, Taira M (2003) Molecular link in the sequential induction of the Spemann organizer: Direct activation of the cerberus gene by Xlim-1, Xotx2, Mix.1, and Siamese, immediately downstream from Nodal and Wnt signaling. *Dev Biol* 257:190–204.
19. Knowlton NM, Kelly GM (2004) Zebrafish Mir antagonizes Frizzled 7-induced gastrulation defects. *Zebrafish* 1:133–144.
20. Lagutin OV, et al. Six3 repression of Wnt signaling in the anterior neuroectoderm is essential for vertebrate forebrain development. *Genes Dev* 17:368–379.
21. Nambiar RM, Henion PD (2004) Sequential antagonism of early and late Wnt-signaling by zebrafish colgate promotes dorsal and anterior fates. *Dev Biol* 267:165–180.
22. Weidinger G, Thorpe CJ, Wuennenberg-Stapleton K, Ngai J, Moon RT (2005) The Sp1-related transcription factors sp5 and sp5-like act downstream of Wnt/beta-catenin signaling in mesoderm and neuroectoderm patterning. *Curr Biol* 15:489–500.
23. Rauch GJ, et al. (1997) Wnt5 is required for tail formation in the zebrafish embryo. *Cold Spring Harbor Symp Quant Biol* 62:227–234.
24. Gritsman K, et al. (1999) The EGF-CFC protein one-eyed pinhead is essential for nodal signaling. *Cell* 97:121–132.
25. Ungar AR, Kelly GM, Moon RT (1995) Wnt4 affects morphogenesis when misexpressed in the zebrafish embryo. *Mech Dev* 52:153–164.
26. Rohr KB, Barth KA, Varga ZM, Wilson SW (2001) The nodal pathway acts upstream of hedgehog signaling to specify ventral telencephalic identity. *Neuron* 29:341–351.
27. Zhang L, et al. (2006) TBX1, a DiGeorge syndrome candidate gene, is inhibited by retinoic acid. *Int J Dev Biol* 50:55–61.
28. Griffin KJ, Amacher SL, Kimmel CB, Kimelman D (1998) Molecular identification of spadetail: regulation of zebrafish trunk and tail mesoderm formation by T-box genes. *Development* 125:3379–3388.
29. Kim CH, et al. (2000) Repressor activity of Headless/Tcf3 is essential for vertebrate head formation. *Nature* 407:913–916.
30. Weidinger G, Thorpe CJ, Wuennenberg-Stapleton K, Ngai J, Moon RT (2005) The Sp1-related transcription factors sp5 and sp5-like act downstream of Wnt/beta-catenin signaling in mesoderm and neuroectoderm patterning. *Curr Biol* 15:489–500.
31. Pogoda HM, Solnica-Krezel L, Driever W, Meyer D (2000) The zebrafish forkhead transcription factor FoxH1/Fast1 is a modulator of nodal signaling required for organizer formation. *Curr Biol* 10:1041–1049.
32. Sirotkin HI, Gates MA, Kelly PD, Schier AF, Talbot WS (2000) Fast1 is required for the development of dorsal axial structures in zebrafish. *Curr Biol* 10:051–1054.
33. Link V, et al. (2006) Identification of regulators of germ layer morphogenesis using proteomics in zebrafish. *J Cell Sci* 119:2073–2083.
34. Dickmeis T, et al. (2001) Identification of nodal signaling targets by array analysis of induced complex probes. *Dev Dyn* 222:571–580.

**Table S3. Numbers of genes enriched in the germ layer precursor populations (category) for various false positive rate cutoffs**

| category     | False positive rate    | number of oligo spots<br>(number of unique genes) | number of hits from<br>curated Nodal-regulated gene list* | estimate of additional<br>Nodal-regulated genes |
|--------------|------------------------|---------------------------------------------------|-----------------------------------------------------------|-------------------------------------------------|
| mesendoderm  | <5% (Pcorr < 0.05%)    | 240 (188)                                         | 26/62 (41.9%)                                             | 55                                              |
| mesendoderm  | <5.3% (Pcorr < 0.053%) | 419 (325)                                         | 28/62 (45.1%)                                             | NA                                              |
| mesendoderm  | <5.5% (Pcorr < 0.055%) | 1075 (843)                                        | 40/62 (64.5%)                                             | NA                                              |
| neurectoderm | <5% (Pcorr < 0.05%)    | 114 (106)                                         | 1/62 (1.6%)                                               |                                                 |
| neurectoderm | <5.3% (Pcorr < 0.053%) | 388 (328)                                         | 1/62 (1.6%)                                               |                                                 |
| neurectoderm | <5.5% (Pcorr < 0.055%) | 1890 (1371)                                       | 3/62 (4.8%)                                               |                                                 |

See *Materials and Methods* for details. The number of unique genes was obtained by subtracting duplicates, ESTs, and predicted genes from the clone list. Ten of the 72 curated Nodal-regulated genes from Bennett *et al.* (1) are not represented on our oligo microarray, so the percentages shown in the last column are calculated from the 62 genes that could be compared. Twenty-two curated Nodal-regulated genes were not detected for the following reasons: 14 were mesendoderm-enriched but eliminated because of high *P* values; three (see table) were enriched in the neurectoderm, and five were not enriched in either population. The estimate of additional Nodal-regulated genes in our data set was calculated as follows: [188 (number of unique genes) – 26 (number of hits on curated Nodal-regulated list)] x 10/21 (our rate of validated margin expression) x 22/31 [frequency of margin-enriched genes being Nodal-regulated (1)].

1. Bennett JT, *et al.* (2007) Nodal signaling activates differentiation genes during zebrafish gastrulation. *Dev Biol* 304:525–540
